# Supplementary material for: Induction of endotoxin tolerance in murine monocyte and macrophage cell populations – optimal LPS dose and compartment-specific reversal by β-glucan
Source: Royal Society of Chemistry journal article supplement (doi:10.1039/d4fo05223d), 2025-01-01
Supplement: d4fo05223d3.pdf [file d4fo05223d3.pdf]

## 1 **Supplementary Figure legends**

2 **Figure S1. *In vivo* exposure to LPS induced *ex vivo* cross-tolerance to PAM3Cys and HK-PA.** IL-6  
3 concentrations measured in supernatant after *ex vivo* PAM3Cys and HK-PA stimulation of splenocytes  
4 **(A)**, bone marrow cells **(B)**, and BMDMs **(C)** from mice *in vivo* exposed to LPS (20, 200, and 2000 µg/kg)  
5 or PBS. Data are presented as mean ± SEM,  $n = 5/\text{group}$ .  $*P < 0.05$ ,  $**P < 0.01$ ,  $***P < 0.001$ ,  $****P <$   
6  $0.0001$ , as analyzed with one-way ANOVA followed by Dunnett's multiple comparisons test.

7 **Figure S2. No effect of yWGP on LPS-induced cross-tolerance in spleen- and bone marrow-derived**  
8 **cells.** yWGP-exposed animals were *i.p.* injected with LPS. IL-6 release was subsequently measured in  
9 the supernatant of splenocytes **(A)**, bone marrow cells **(B)**, and BMDMs **(C)** *ex vivo* stimulated with  
10 PAM3Cys and HK-PA for 24 h. Data are presented as mean ± SEM,  $n = 7$  for control and LPS-tolerized  
11 animals and  $n = 6$  for yWGP-exposed animals.  $*P < 0.05$ ,  $****P < 0.0001$ , as analyzed with one-way  
12 ANOVA followed by Dunnett's multiple comparisons test **(A, B)** or Kruskal-Wallis test followed by  
13 Dunn's multiple comparisons test **(C)**.
