# Supplementary material for: Induction of endotoxin tolerance in murine monocyte and macrophage cell populations – optimal LPS dose and compartment-specific reversal by β-glucan
Source: Royal Society of Chemistry journal article supplement (doi:10.1039/d4fo05223d), 2025-01-01
Supplement: d4fo05223d4.pdf [file d4fo05223d4.pdf]

**Table S1. Composition of the intervention diets.**

| Diet name<br>Ingredients<br><i>g/kg dry matter</i> | Control | WGP   |
|----------------------------------------------------|---------|-------|
|                                                    |         | 1%    |
| <b>Carbohydrates</b>                               |         |       |
| Cornstarch                                         | 452.9   | 418.6 |
| Dextrinized cornstarch                             | 151.3   | 174.8 |
| Sucrose                                            | 97.3    | 97.3  |
| <b>Protein</b>                                     |         |       |
| Casein                                             | 140.0   | 139.5 |
| <b>Fat</b>                                         |         |       |
| Soybean oil                                        | 38.6    | 35.7  |
| <b>Fibers</b>                                      |         |       |
| Cellulose                                          | 47.5    | 38.0  |
| yWGP                                               | 0.0     | 12.7  |
| <b>Others</b>                                      |         |       |
| Mineral mix <sup>[1]</sup>                         | 35.0    | 35.0  |
| Vitamin mix <sup>[1]</sup>                         | 10.0    | 10.0  |
| Choline bitartrate                                 | 2.5     | 2.5   |
| <i>Tert</i> -butylhydroquinone                     | 0.008   | 0.008 |

The control diet is AIN-93M without the antioxidant L-cysteine added. yWGP (yeast-derived whole  $\beta$ -glucan particle) was added to the AIN-93M diet (with a correction for fiber purity; 75%) at the expense of cellulose. To be isocaloric to the control diet, the fiber diet needed to be adjusted in added carbohydrates and protein. Since sucrose might influence intestinal transit, it was kept equal for all diets.

**Table S2. Physicochemical composition of yWGP.**

| Preparation | Relative Solubility (%) | Monosaccharides (mol%) |     |     |     |     |     |             | Total saccharide content (w/w%) | Protein content (%) | LPS (EU/mg) |
|-------------|-------------------------|------------------------|-----|-----|-----|-----|-----|-------------|---------------------------------|---------------------|-------------|
|             |                         | Rha                    | Ara | Xyl | Man | Gal | Glc | Uronic acid |                                 |                     |             |
| yWGP        | < 13                    | 0                      | 1   | 0   | 0   | 0   | 96  | 3           | 64                              | 16                  | N.D.        |

*Rha*, rhamnose; *ara*, arabinose; *xyl*, xylose; *man*, mannose; *gal*, galactose; *glc*, glucose; *LPS*, lipopolysaccharide; *N.D.*, not detectable. The physicochemical composition data of yWGP is derived from <sup>15</sup>.
